# Supplementary material for: Identification of Genome-Wide Mutations in Ciprofloxacin-Resistant F. tularensis LVS Using Whole Genome Tiling Arrays and Next Generation Sequencing
Source: PubMed Central journal article supplement (PMC5036845; doi:10.1371/journal.pone.0163458), 2016-09-26
Supplement: pone.0163458.s001.pdf [file pone.0163458.s001.pdf]

Normalized Log Ratio

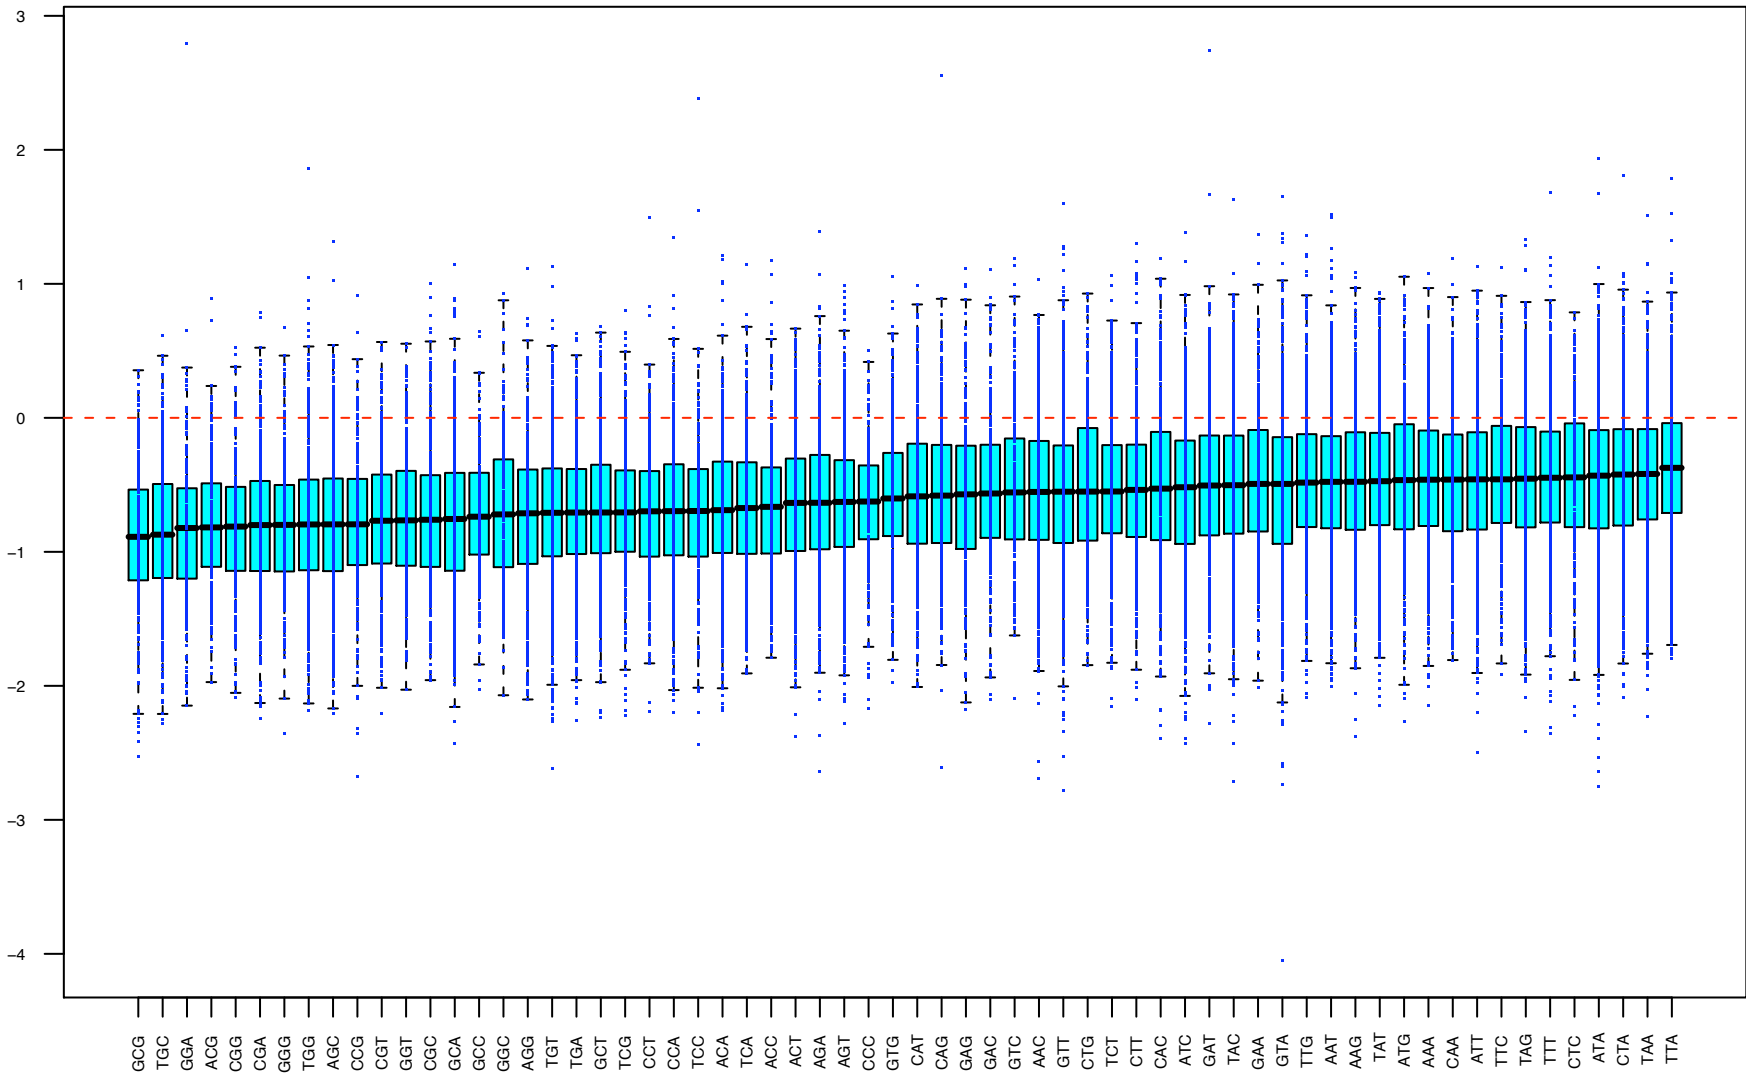

Triplet at SNP Position
