# Supplementary material for: Identification of Genome-Wide Mutations in Ciprofloxacin-Resistant F. tularensis LVS Using Whole Genome Tiling Arrays and Next Generation Sequencing
Source: PLoS One. 2016 Sep 26;11(9):e0163458. doi: 10.1371/journal.pone.0163458 (PMC5036845; doi:10.1371/journal.pone.0163458)
Supplement: S3 Table — The location of the SNP, the number of reads and the percentage of reads containing the SNPs are included. (XLSX) [file pone.0163458.s005.xlsx]

## Sheet: Sheet1
S3 Table. SNPs identified from F. tularensis Cipro resistant clones on both strands. The location of the SNP, the number of reads and the percentage of reads containing the SNPs are included.
			Clone ID
Gneome Location	Gene annotation	SNP	FTR 1	FTR 2	FTR 3	FTR 4	FTR 5	FTR 6	FTR 7	FTR 8	FTR 9	FTR 10	FTR 11
		Type
			1_1_5	5_8_3	8_7_2	11_4_3	12_3_4	14_6_5	15_6_5	16_10_2	18_5_2	21_8_2	23_2_4
71043	Hypothetical membrane protein [FTL_0073]	Sub C->A	0	3	594	1	0	1	0	0	0	0	0	# of reads
			0	0.0039	0.9966	0.0009	0	0.001	0	0	0	0	0	% of total reads
204333	TPR (tetratricopeptide repeat) domain protein [FTL_0204]	Sub G->T	0	0	0	616	0	0	0	0	0	0	0
			0	0	0	1	0	0	0	0	0	0	0
406467	Hypothetical protein [FTL_0439]	Sub A->T	0	1	0	0	0	0	198	0	0	0	0
			0	0.002	0	0	0	0	0.6018	0	0	0	0
406950	Hypothetical protein [FTL_0439]	Sub G->T	1	0	1	0	0	1	1	390	1	0	0
			0.0009	0	0.0015	0	0	0.0018	0.0028	0.9974	0.0021	0	0
407039	Hypothetical protein [FTL_0439]	Sub C->A	1	0	0	0	0	0	0	0	0	585	0
			0.0008	0	0	0	0	0	0	0	0	0.9983	0
407700	Hypothetical protein [FTL_0439]	Sub G->A	655	0	0	381	395	0	0	2	313	1	0
			1	0	0	0.9974	1	0	0	0.0049	0.9937	0.0023	0
407701	Hypothetical protein [FTL_0439]	Sub A->G	0	0	0	0	0	0	0	0	0	0	354
			0	0	0	0	0	0	0	0	0	0	0.9972
431242	Glucosamine--fructose-6-phosphate aminotransferase [FTL_0454]	Sub C->A	0	1	0	0	0	0	1	0	0	443	0
			0	0.0019	0	0	0	0	0.0023	0	0	1	0
436130	DNA topoisomerase IV subunit A [FTL_0462]	Sub C->A	0	334	0	1	0	0	0	0	0	0	0
			0	0.5154	0	0.0014	0	0	0	0	0	0	0
466243	Phosphoglucomutase, [FTL_0484]	Sub G->T	0	0	0	0	0	202	0	0	0	0	0
			0	0	0	0	0	0.6558	0	0	0	0	0
514141	DNA gyrase, subunit A [FTL_0533]	Sub C->A	0	1	0	0	444	766	0	0	0	414	0
			0	0.0045	0	0	1	1	0	0	0	0.9976	0
514141	DNA gyrase, subunit A [FTL_0533]	Sub C->T	842	222	683	211	0	0	0	157	1	0	0
			1	0.9955	1	0.9953	0	0	0	1	0.0043	0	0
514152	DNA gyrase, subunit A [FTL_0533]	Sub G->A	0	246	0	0	0	0	430	188	0	0	0
			0	0.988	0	0	0	0	0.9954	0.9947	0	0	0
514152	DNA gyrase, subunit A [FTL_0533]	Sub G->T	0	1	0	242	0	0	0	1	255	0	335
			0	0.004	0	1	0	0	0	0.0053	1	0	1
527613	Hypothetical protein, [FTL_0544]	Sub G->T	0	0	0	1	0	0	0	0	0	0	164
			0	0	0	0.0034	0	0	0	0	0	0	1
578478	dTDP-glucose 4,6-dehydratase [FTL_0592]	Ins T	2	0	0	0	0	0	0	0	0	0	124
			1	0	0	0	0	0	0	0	0	0	1
578479	dTDP-glucose 4,6-dehydratase [FTL_0592]	Ins T	2	0	0	0	0	0	0	0	0	0	127
			1	0	0	0	0	0	0	0	0	0	1
578480	dTDP-glucose 4,6-dehydratase [FTL_0592]	Ins T	2	0	0	0	0	0	0	0	0	0	127
			1	0	0	0	0	0	0	0	0	0	1
578481	dTDP-glucose 4,6-dehydratase [FTL_0592]	Ins T	1	0	0	0	0	0	0	0	0	0	127
			0.5	0	0	0	0	0	0	0	0	0	1
578482	dTDP-glucose 4,6-dehydratase [FTL_0592]	Ins T	1	0	0	0	0	0	0	0	0	0	127
			1	0	0	0	0	0	0	0	0	0	1
578483	dTDP-glucose 4,6-dehydratase [FTL_0592]	Ins T	1	0	0	0	0	0	0	0	0	0	126
			0.5	0	0	0	0	0	0	0	0	0	1
578484	dTDP-glucose 4,6-dehydratase [FTL_0592]	Ins T	1	0	0	0	0	0	0	0	0	0	122
			1	0	0	0	0	0	0	0	0	0	1
582752	UDP-glucose/GDP-mannose dehydrogenase [FTL_0596]	Sub G->T	0	1	0	0	0	0	0	376	3	0	0
			0	0.0016	0	0	0	0	0	1	0.0174	0	0
588296	asparagine synthase [FTL_0600]	Sub G->T	0	0	0	0	0	0	156	0	0	0	0
			0	0	0	0	0	0	1	0	0	0	0
588909	asparagine synthase [FTL_0600]	Sub G->A	0	0	0	172	0	1	0	0	0	0	0
			0	0	0	1	0	0.0048	0	0	0	0	0
589187	sugar transamine/perosamine synthetase [FTL_0601]	Sub C->A	0	0	176	0	0	0	0	0	0	0	0
			0	0	0.9944	0	0	0	0	0	0	0	0
589311	sugar transamine/perosamine synthetase [FTL_0601]	Sub C->T	0	1	0	0	0	0	197	1	0	0	0	synonymous
			0	0.0043	0	0	0	0	0.9949	0.0031	0	0	0
592587	Glycosyltransferase [FTL_0604]	Sub C->A	2	0	0	0	159	0	0	0	0	0	0
			0.0028	0	0	0	0.9876	0	0	0	0	0	0
833238	RNA polymerase factor sigma-32 [FTL_0851]	Sub A->T	0	0	0	0	0	0	0	0	0	0	204
			0	0	0	0	0	0	0	0	0	0	0.8987
851357	Hypothetical protein [FTL_0872]	Sub G->A	0	0	0	0	0	1	0	0	0	0	80
			0	0	0	0	0	0.0061	0	0	0	0	0.9877
1053314	Conserved hypothetical protein [FTL_1107]	Sub G->T	1	0	1	0	0	2	0	298	2	0	0
			0.0011	0	0.0016	0	0	0.0032	0	1	0.0101	0	0
1264162	Intergenic preceding outer membrane associated protein [FTL_1328]	Sub T->A	0	0	0	0	0	0	85	0	0	0	0
			0	0	0	0	0	0	1	0	0	0	0
1477418	DNA gyrase subunit B [FTL_1547]	Sub G->T	1	0	1	0	0	1	0	0	682	0	0
			0.0009	0	0.0013	0	0	0.002	0	0	0.9971	0	0
1477419	DNA gyrase subunit B [FTL_1547]	Sub A->C	0	0	0	0	0	0	2	1	0	0	672
			0	0	0	0	0	0	0.0041	0.0019	0	0	0.9985
1604488	Efflux protein, RND family, MFP subunit [FTL_1671]	Sub C->A	0	0	0	0	0	0	400	0	0	0	0
			0	0	0	0	0	0	1	0	0	0	0
1683798	50S ribosomal protein L11 [FTL_1748]	Sub A->C	559	0	0	0	0	0	0	0	0	0	0
			0.6411	0	0	0	0	0	0	0	0	0	0
1706353		ins T	6	40	23	32	29	18	29	28	56	31	21
			1	1	1	0.9697	1	1	1	1	1	1	1
1874528	Hypothetical protein [FTL_1945]	Sub A->T	2	0	0	0	1	0	180	0	0	0	0
			0.0046	0	0	0	0.0083	0	0.9091	0	0	0	0
